# Increased risk of fungal infection detection in women using menstrual cups vs. tampons

Nicolas Tessandier<sup>1,2,\*</sup>, Ilkay Başak Uysal<sup>2,#</sup>, Baptiste Elie<sup>2,#</sup>, Christian Selinger<sup>2</sup>, Claire Bernat<sup>2</sup>, Vanina Boué<sup>2</sup>, Sophie Grasset<sup>2</sup>, Soraya Groc<sup>2</sup>, Tsukushi Kamiya<sup>1,3</sup>, Massilva Rahmoun<sup>2</sup>, Bastien Reyné<sup>2</sup>, Noemi Bender<sup>4</sup>, Marine Bonneau<sup>5</sup>, Christelle Graf<sup>5</sup>, Vincent Tribout<sup>6</sup>, Vincent Foulongne<sup>7</sup>, Jacques Ravel<sup>8</sup>, Tim Waterboer<sup>4</sup>, Christophe Hirtz<sup>9</sup>, Ignacio G Bravo<sup>2</sup>, Jacques Reynes<sup>10</sup>, Michel Segondy<sup>11</sup>, Carmen Lia Murall<sup>2,12</sup>, Nathalie Boulle<sup>13</sup>, Samuel Alizon<sup>1,2,\*</sup>

<sup>1</sup> Center for Interdisciplinary Research in Biology (CIRB), College de France, CNRS, INSERM, Université PSL, Paris, France

<sup>2</sup> Laboratoire MIVEGEC (UMR CNRS 5290, IRD 224, UM), Montpellier, France

<sup>3</sup> HRB Clinical Research Facility, National University of Ireland Galway, Ireland

<sup>4</sup> Molecular Diagnostics of Oncogenic Infections, Infection, Inflammation and Cancer Program, German Cancer Research Center (DKFZ), Im Neuenheimer Feld, Heidelberg, Germany.

<sup>5</sup> Department of Obstetrics and Gynaecology, Centre Hospitalier Universitaire de Montpellier, Montpellier, France

<sup>6</sup> Center for Free Information, Screening and Diagnosis (CeGIDD), Centre Hospitalier Universitaire de Montpellier, Montpellier, France

<sup>7</sup> Pathogenesis and Control of Chronic Infections, Montpellier University, INSERM, EFS, Montpellier, France.

<sup>8</sup> Institute for Genome Sciences, Department of Microbiology and Immunology, University of Maryland School of Medicine, Baltimore, MD, USA

<sup>9</sup> LBPC/PPC- IRMB, CHU de Montpellier and Université de Montpellier, Montpellier, France

<sup>10</sup> Infectious Diseases Department, University Hospital Montpellier; INSERM U1175/Institut de Recherche et de Developement, Unité Mixte International, Montpellier, France.

<sup>11</sup> Pathogenesis and Control of Chronic Infections, University of Montpellier, INSERM, EFS, CHU Montpellier, Montpellier, France.

<sup>12</sup> Current address: Department of Biological Sciences, Université de Montréal, Montréal, Canada

<sup>13</sup> Pathogenesis and Control of Chronic Infections, University of Montpellier, INSERM, EFS; Departement of Pathology and Oncobiology, Laboratory of Solid Tumors, CHU Montpellier, Montpellier, France.

# Equal contribution

\* Corresponding authors: nicolas.tessandier@college-de-france.fr, samuel.alizon@cnrs.fr

## Abstract

Menstrual cups are gaining in popularity worldwide as a more environmentally sustainable and affordable alternative to disposable personal hygiene products. However, there is currently a lack of scientific literature regarding their safety and potential effects on women's health. We analysed biological, demographic, and behavioural data in a cohort of young adult women using either tampons ( $n = 81$ ) or menstrual cups ( $n = 22$ ). We identify an increased risk of being diagnosed with fungal infection for women using menstrual cups over tampons. We did not detect significant differences between groups in terms of vaginal microbiota composition or local cytokines expression profile. However we found that depending on the type of menstrual product they use more (cups or tampons), women fall into two different clusters in a factor analysis of mixed data, which potentially reflects differences in their local vaginal environments. These results underline the urgent need for in-depth studies to better understand the potential associations between menstrual product products and women's health.

**Keywords**— menstrual hygiene management; women's health; genital infections; vaginal microbiota; fungal infections; immunity

## 52 Introduction

53 Menstruation is associated with reproductive health, but it also has implications beyond phys-  
54 ical health, as recognised by the emergent concept of menstrual health [1]. Furthermore, the  
55 risks associated with menstrual poverty [2] are increasingly recognised and include for instance  
56 bacterial vaginosis [3] or reproductive tract infections [4].

57 Among the variety of products used during the menses, menstrual cups are perceived as a  
58 safe, practical, economical, and ecologically-friendly alternative to tampons and sanitary pads [5].  
59 The majority of women using them report wanting to continue to using them both in high and  
60 low-income settings, showing a good level of acceptability [5, 6]. Nevertheless, there have been  
61 some reported cases of toxic shock syndrome, renal colic, and allergies associated with menstrual  
62 cup usage [5]. Moreover, higher levels of *Staphylococcus aureus* growth have been reported in  
63 menstrual cups compared to tampons [7]. However, the number of case studies is limited and we  
64 know little about potential health risks associated with cup usage compared to other menstrual  
65 hygiene products [5].

66 We hypothesised that the type of menstrual hygiene products can shape the vaginal immuno-  
67 logical and microbiological environment in a way that could affect women’s health. We analysed  
68 biological, demographic, and behavioural longitudinal data from 149 women, in the context of the  
69 PAPCLEAR clinical study on human papillomavirus (HPV) infections [8]. We focused in partic-  
70 ular on the local impact of the different product use and, using statistical modelling, identified  
71 profile differences depending on the type of menstrual product used.

## 72 Results

73 The 103 women who could be included in the analysis were aged from 18 to 25 years old and  
74 primarily university students. Their main demographic characteristics are shown in Table S1.  
75 We stratified the population according to the most frequent type of menstrual product used,  
76 *i.e.* either tampons,  $n = 81$  women, or menstrual cups,  $n = 22$  (see the Supplementary Methods).  
77 The self-reported stress level was the only variable for which the two groups differed slightly (p-  
78 value=0.08), with menstrual cup users reporting more frequently a moderate level of stress than  
79 tampon users (Extended data Table S1).

80 We used generalised linear models to detect potential differences in key covariates (listed in  
81 Extended data Table S2) between the two groups. The best model, according to our selection  
82 approach (see Supplementary Methods), shows that a significantly lower fraction of menstrual  
83 cup users identify themselves as smokers compared to tampon users ( $OR = 0.18$ ), and that the  
84 fraction of women using menstrual cups presenting a genital infection by human papillomaviruses

(HPVs) is also lower ( $OR = 0.36$ ). Conversely, reporting using menstrual cups was more associated with the detection of a fungal infection during the gynaecological exam ( $OR = 6.55$ ). There was also a marginally significant trend of increased risk of urinary tract infection. Importantly, **Smoking and Fungal infection** were the only two covariates to be present and significant in the best model and in the models comparable to it based on an Akaike Information Criterion (see Supplementary Methods and Table S3).

To better understand the relative importance of menstrual products on the occurrence of fungal infections, we performed another set of generalised linear models, this time evaluating the covariates associated with fungal infection. The selection procedure yielded a best model according to which smoking ( $p = 0.02$ ) and the use of menstrual cups ( $p = 0.004$ ) were associated with a higher risk of being diagnosed with a fungal infection (Figure 1A). There was also a marginally significant association with being vaccinated against HPV in women diagnosed with fungal infection ( $p = 0.07$ ). The type of menstrual product used the most (cups or tampons) was the only covariate present and significant in all of the 111 next best models selected (Extended data Table S4), further confirming its association with fungal infection in our cohort.

To study a potential association between the type of menstrual protection used and the vaginal microbiota, we performed a 16S metabarcoding analysis (Figure 1B). We found no significant difference in community state types (CST) composition (Figure 1C), although there were some qualitative differences. For instance, none of the menstrual cup users displayed a CST II or V [9]. We also did not find any significant differences in microbiota diversity, assessed using Shannon diversity index, between women using menstrual cups or tampons (Figure 1D).

To assess the potential effect of menstrual cups on the local immune response, we analysed cytokines and chemokine relative concentrations in cervical samples [10]. Among the 20 analytes

**Table 1: Association between menstrual cups usage in comparison with tampons.** Results show the odds ratio (OR) of the factors selected in the best generalised linear model using an Akaike Information Criterion (AIC). MC stands for menstrual cups, SE for standard error and CI for confidence interval.

| Response variable: MC (tampon as reference) | OR    | OR SE | CI 2.5% | CI 95% | p.value |    |
|---------------------------------------------|-------|-------|---------|--------|---------|----|
| Urinary tract infection                     | 3.445 | 2.374 | 0.856   | 13.369 | 0.073   | •  |
| Smoking                                     | 0.184 | 0.097 | 0.061   | 0.487  | 0.001   | ** |
| HPV infection                               | 0.356 | 0.179 | 0.126   | 0.923  | 0.040   | *  |
| Number of partners over the last 12 months  | 1.039 | 0.020 | 1.001   | 1.080  | 0.042   | *  |
| Fungal infection                            | 6.547 | 4.220 | 1.856   | 24.103 | 0.004   | ** |

\*\*\* $p < 0.001$ ; \*\* $p < 0.01$ ; \* $p < 0.05$ ; •  $p < 0.1$

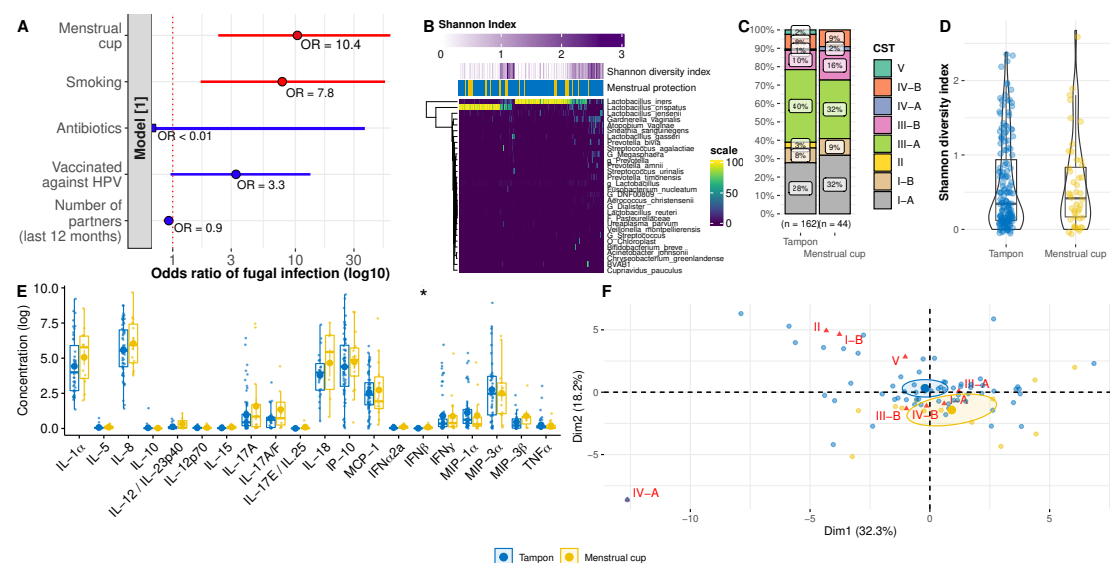

**Figure 1: Epidemiological, microbiological, and immunological differences between women using mainly menstrual cups or tampons.** A) Odds ratio of covariates associated with the risk of being diagnosed with a fungal infection, B) Abundance and diversity of the main bacterial species found in participants, C) Community State Types (CST) distribution, D) Shannon diversity index, E) Cytokines local concentrations (log), and F) Outcome of a multi-parametric clustering analysis using factor analysis of mixed data (FAMD). In A, red indicates significance ( $p < 0.05$ ) and blue indicates non-significance. In D, E, and F, colours show the type of menstrual product used (tampons in blue and cups in yellow). In F, the CSTs are shown in red.

measured, only IFN- $\beta$  appeared to be significantly increased in women using cups ( $p = 0.044$ ), although this association did not withstand correction for multiple testing comparisons ( $p = 0.89$ ) (Figure 1E).

Finally, we performed a profile analysis using a factor analysis of mixed data (FAMD) approach with CSTs distribution, Shannon diversity index, cytokines, and chemokines relative concentrations. The results show that women who use tampons and women using menstrual cups fall into different clusters (Figure 1F and Extended data Figure S1), suggesting that the type of menstrual product used could be shaping the local immunological and microbial environment. Conversely, a similar multiple correspondence analysis (MCA) approach using blood seropositivity status for IgG and IgM of several sexually transmitted infections (STIs), including HPVs (see Supplementary Methods) detected no clustering effect (Extended data Figure S2), hinting that the women in these two groups originate from similar populations in terms of the risk of exposition to STIs.

## 121 Discussion

122 Menstrual cups are gaining in popularity as an environmentally sustainable and affordable type  
123 of menstrual protection [5]. However, there currently is a lack of epidemiological and biological  
124 data to assess their safety. Using the PAPCLEAR study [8], we compared microbiological,  
125 immunological, and epidemiological profiles of women depending on whether they report using  
126 mainly cups or tampons.

127 We did not identify strong demographic or behavioural biases between our two populations,  
128 except for reported stress levels. On the epidemiological side, we detected a strong association  
129 between the use of menstrual cups and the risk of fungal infections. We also found a marginally  
130 significant positive association with urinary tract infections. Finally, we identified a negative  
131 significant association with HPV infection. Note that women using menstrual cups reported a  
132 greater number of partners and less smoking than women using tampons, which suggests the  
133 decreased HPV prevalence is not due to differences in sexual contact. To further understand  
134 the occurrence of fungal infections, we performed another model which confirmed their strong  
135 association with menstrual cup use, as well as smoking, number of partners, and vaccination  
136 against HPV.

137 Biological analyses revealed an absence of significant difference between vaginal microbiota  
138 compositions depending on the type of menstrual product used. For local cytokine and chemokine  
139 relative concentrations, only one potential difference was identified in IFN- $\beta$ . However, the joint  
140 analysis of microbiota and immunological data showed that women segregate into two clusters  
141 based on the type of menstrual product they use most. Similar analyses using circulating antibodies  
142 found no such clustering patterns, which reinforces our conclusion that the two populations  
143 of women studied do not differ from an epidemiological standpoint (their past exposition to STIs  
144 being comparable) but, potentially, from their local vaginal environment.

145 Our study has several limitations, the strongest being the relatively small sample size of  
146 the cohort used ( $n = 103$ ), which was originally designed to study HPV infections. This may  
147 hinder our ability to detect moderate or subtle changes induced by the menstrual cups in the  
148 vaginal environment. Another limitation of the study lies in its cross-sectional nature. Further  
149 longitudinal analyses would be helpful to establish long-term potential impacts of the use of  
150 menstrual cups on the local environment, for example, on the vaginal microbiota composition.  
151 Finally, although fungal infections were reported by a trained gynaecologist or midwife during  
152 consults, we cannot provide more details regarding the fungal species responsible for the infection,  
153 nor their abundance. From a statistical standpoint, a potential issue has to do with pseudo-  
154 replication since we analyse two visits for each participant. To address it, we analysed each of

the two visits independently. In both cases, the associations between menstrual cup use, smoking, and fungal infection were significant (Table S5 and S6).

Finally, other factors have been shown to shape the vaginal environment [9]. Here, we included for instance the use of lubricants in the analysis but more detailed studies could also include contraception methods or probiotic use.

Menstrual cups are one of the most popular alternatives to disposable menstrual products. As the demand for ‘eco-friendly’ and less expensive menstrual products arises, it is crucial to better understand the effect of these products on women’s health.

## Bibliography

1. Hennegan, J. *et al.* Menstrual health: a definition for policy, practice, and research. *Sex. Reprod. Health Matters* **29** (2021).
2. Carneiro, M. M. Menstrual poverty: enough is enough. *Women Health* **61**, 721–722 (2021).
3. Phillips-Howard, P. A. *et al.* Menstrual cups and sanitary pads to reduce school attrition, and sexually transmitted and reproductive tract infections: a cluster randomised controlled feasibility study in rural Western Kenya. *BMJ Open* **6** (2016).
4. Torondel, B. *et al.* Association between unhygienic menstrual management practices and prevalence of lower reproductive tract infections: a hospital-based cross-sectional study in Odisha, India. *BMC Infect Dis* **18**, 473 (2018).
5. Van Eijk, A. M. *et al.* Menstrual cup use, leakage, acceptability, safety, and availability: a systematic review and meta-analysis. *Lancet Public Health* **4**, e376–e393 (2019).
6. North, B. B. & Oldham, M. J. Preclinical, clinical, and over-the-counter postmarketing experience with a new vaginal cup: menstrual collection. *J Womens Health* **20**, 303–311 (2011).
7. Nonfoux, L. *et al.* Impact of Currently Marketed Tampons and Menstrual Cups on *Staphylococcus aureus* Growth and Toxic Shock Syndrome Toxin 1 Production *In Vitro. Appl. Environ. Microbiol.* **84** (2018).
8. Murall, C. L. *et al.* Natural history, dynamics, and ecology of human papillomaviruses in genital infections of young women: Protocol of the PAPCLEAR cohort study. *BMJ Open* **9**, 25129 (2019).
9. Ravel, J. *et al.* Vaginal microbiome of reproductive-age women. *Proc Nat Acad Sci USA* **108**, 4680–4687 (2011).

- 188 10. Selinger, C. *et al.* Cytokine response following perturbation of the cervicovaginal  
189 milieu during HPV genital infection. *Immunol. Res.* **69**, 255–263 (2021).
