# Supplementary material for: Increased risk of fungal infection detection in women using menstrual cups vs. tampons: a cross-sectional study
Source: bioRxiv or medRxiv preprint supplement (doi:10.1101/2021.12.10.21267584), 2022-01-07
Supplement: Supplementary file [file media-1.pdf]

29 study. There was no difference in follow-up duration between women using mostly cups  
30 or mostly tampons (Table 1).

31 The demographic, behavioural, and biological analyses were performed on the first  
32 two visits of the participant (V1 and V2), which were spread 4 weeks apart.

## 33 Biological analyses

34 Antibodies were analysed according to methods from Waterboer *et al.* [2] and already  
35 partly analysed in Murall *et al.* [3] in the context of HPV infection.

36 The cytokine data were obtained using MesoScale discovery (MSD) technology from  
37 vaginal secretions collected using ophthalmic sponges as described in Murall *et al.* [1]  
38 and was already analysed in the context of HPV infections by Selinger *et al.* [4]. We  
39 used the same protocol to obtain normalised values (per total protein concentration).

40 The microbiota profiling was performed via metabarcoding using the V3-V4 region  
41 of the 16S gene, as discussed in the study protocol [1]. The assignment of the community  
42 state type was done using the VALENCIA software package [5].

## 43 Statistical analysis

44 We used binomial regression models for models in Table 1, Figure 1A, and in  
45 Extended data Tables S5 and S6. For each model, we computed the odds ratios associ-  
46 ated with each predictor along a 95% confidence interval. All analyses were performed in  
47 R (4.1.2). We used the `glmulti` function to conduct binomial regressions and selected  
48 the best model using the Akaike Information Criterion corrected for small sample size  
49 (AICc). We used a lowest AICc +5 interval for the most probable best models (Table  
50 S3 and S4) [6]. For clustering analysis, factor analysis of mixed data (FAMD) was used  
51 when combining both factor and numeric data (Figure 1F), and multiple correspondence  
52 analysis (MCA) was used when analysing binary data (Figure S2) [7].

## 53 Data availability

54 Table 1 and Figure 1, as well as Extended Data Tables S1, S3, S4 and Figure S2 have  
55 associated raw data. The data that support the findings of this study are available from  
56 the corresponding author upon request, and data are available in the Zenodo public  
57 repository (XXXXX).

## 58 Ethics

59 The PAPCLEAR trial is promoted by the Centre Hospitalier Universitaire de Mont-  
60 pellier and has been approved by the Comité de Protection des Personnes (CPP) Sud  
61 Méditerranée I on 11 May 2016 (CPP number 16 42, reference number ID RCB 2016-  
62 A00712-49); by the Comité Consultatif sur le Traitement de l'Information en matière de  
63 Recherche dans le domaine de la Santé on 12 July 2016 (reference number 16.504); and

64 by the Commission Nationale Informatique et Libertés on 16 December 2016 (reference  
65 number MMS/ABD/AR1612278, decision number DR-2016-488). This trial was autho-  
66 rised by the Agence Nationale de Sécurité du Médicament et des Produits de Santé on 20  
67 July 2016 (reference 20160072000007). The ClinicalTrials.gov identifier is NCT02946346.  
68 All participants provided written informed consent.

## 69 **Acknowledgements**

70 The authors thank all participants of the PAPCLEAR study and clinical staff and nurses  
71 for their help.

## 72 **Funding**

73 This work was supported by the European Research Council (ERC) under the European  
74 Union’s Horizon 2020 research and innovation programme [grant agreement No 648963  
75 to SA]. NT is an ANRS-MIE fellow. IBU is funded by the FHU INCH. TK is funded  
76 by the Fondation pour la Recherche Médicale. The sponsors had no role in the study  
77 design; in the collection, analysis, and interpretation of data; in the writing of the report;  
78 and in the decision to submit the article for publication.

## 79 **Declaration of Competing Interest**

80 The authors declare the following financial interests/personal relationships which may  
81 be considered as potential competing interests: TW serves on advisory boards for MSD  
82 (Merck) Sharp & Dohme.

## 83 **Contributions**

84 NT, CLM, NBo, and SA designed the study. NT, CLM, BE, BE, TK, IGB, and SA  
85 designed the experiments. CB, VB, SGro, MR, and NBe performed experiments. CH,  
86 JRa, and TW contributed reagents, materials, and analysis tools. CB, VB, SGra, SGro,  
87 MR, MB, CG, VT, VF, CLM, JRe, IGB, MSe, NBo, and SA contributed to study design,  
88 patient recruitment, and clinical data acquisition. NT, IBU, BE, BR, CS, TK, CLM,  
89 and SA performed data analyses. NT, IBU, IGB, CLM, and SA wrote the initial version  
90 of the manuscript. All authors approved the final version of the manuscript.

## S2 Supplementary Results

Table S1: Key characteristics of participants included in the study.  $n$  indicates the number of individuals, p-value refers to the outcome of a Kruskal-Wallis Rank Sum Test (`kruskal.test` function in R), IQR is the interquartile range, SD the standard deviation.

|                                                                | Tampon                  | Menstrual cup           | p-value |
|----------------------------------------------------------------|-------------------------|-------------------------|---------|
| $n$                                                            | 81                      | 22                      |         |
| Follow-up duration (days, median [IQR])                        | 301.00 [203.00, 455.00] | 409.50 [238.50, 515.50] | 0.165   |
| Number of partners over the last 12 months (median [IQR])      | 8.00 [3.00, 15.00]      | 6.00 [4.00, 14.75]      | 0.886   |
| Age (years, median [IQR])                                      | 21.30 (1.85)            | 21.95 (2.50)            | 0.174   |
| Age at menarchy (years, median [IQR])                          | 13.00 [12.00, 14.00]    | 13.00 [12.25, 14.00]    | 0.665   |
| Body Mass Index (BMI, median [IQR])                            | 21.03 [19.61, 23.34]    | 21.77 [20.66, 23.41]    | 0.387   |
| Antibiotics = Yes (%)                                          | 5 ( 6.2)                | 2 ( 9.1)                | 0.996   |
| Smoking = Yes (%)                                              | 31 (40.3)               | 5 (22.7)                | 0.209   |
| Lubricant (%)                                                  | 28 (35.0)               | 8 (36.4)                | 1.000   |
| HPV positive (positive for the same HPV at the two visits) (%) | 40 (49.4)               | 7 (31.8)                | 0.220   |
| Intercourse with a regular partner (last week)                 | 50 (61.7)               | 13 (59.1)               | 1.000   |
| Intercourse with an occasional partner (last week)             | 11 (13.6)               | 3 (13.6)                | 1.000   |
| Stress level (%)                                               |                         |                         | 0.081   |
| 0 (Min)                                                        | 17 (21.0)               | 4 (18.2)                |         |
| 1                                                              | 35 (43.2)               | 7 (31.8)                |         |
| 2                                                              | 20 (24.7)               | 11 (50.0)               |         |
| 3 (Max)                                                        | 9 (11.1)                | 0 ( 0.0)                |         |
| Self-reported menses during the past week                      | 44 (54.3)               | 15 (68.2)               | 0.356   |
| Co-infected by multiple HPVs                                   | 27 (33.3)               | 7 (31.8)                | 1.000   |
| Age at sexual debut (mean (SD))                                | 16.40 (1.55)            | 16.50 (1.97)            | 0.792   |
| HPV vaccinated (%)                                             | 37 (47.4)               | 14 (70.0)               | 0.121   |

| Covariate                                  | Data type   | Values                     | Description                                                           | source                           |
|--------------------------------------------|-------------|----------------------------|-----------------------------------------------------------------------|----------------------------------|
| Number of partners over the last 12 months | Numeric     | 1 to 63                    | Number of partners over the last 12 months                            | Questionnaire at inclusion visit |
| Smoking                                    | Binary      | Yes/No                     | Self-reported smoking during past week                                | Questionnaire at inclusion visit |
| Intercourse with an occasional partner     | Binary      | Yes/No                     | Intercourse with an occasional partner during the past week           | Questionnaire at inclusion visit |
| HPV vaccinated                             | Binary      | Yes/No                     | Vaccinated against HPV                                                | Questionnaire at inclusion visit |
| Menstrual protection                       | Binary      | Menstrual cups/<br>Tampons | Questionnaire at inclusion visit                                      |                                  |
| HPV focal                                  | Binary      | Yes/No                     | DEIA positive for at least one HPV genotype at two consecutive visits | Laboratory testing               |
| Age                                        | Numeric     | 21:29                      | Self-reported current age                                             | Questionnaire at inclusion visit |
| Lubricant                                  | Binary      | Yes/No                     | Self-reported using sexual lubricant during past week                 | Questionnaire at inclusion visit |
| HPV positive (multiple HPV)                | Binary      | Yes/No                     | DEIA positive for at more than one HPV genotype                       | Laboratory testing               |
| Antibiotics                                | Binary      | Yes/No                     | Used antibiotics during past week                                     | Questionnaire at inclusion visit |
| Intercourse with a regular partner         | Binary      | Yes/No                     | Self-reported intercourse with a regular partner during past week     | Questionnaire at inclusion visit |
| Menses                                     | Binary      | Yes/No                     | Self-reported menses during past week                                 | Questionnaire at inclusion visit |
| Stress level                               | Categorical | 0 (Min), 1, 2, 3 (Max)     | Self-reported stress level during past week                           | Questionnaire at inclusion visit |

Table S2: Factors used in the best models selection by AICc

| Model [1]                                          | Presence in best models (#) | Presence in best models (%) | p.value < 0.1(%) | p.value < 0.05(%) |
|----------------------------------------------------|-----------------------------|-----------------------------|------------------|-------------------|
| Smoking                                            | 68                          | 100                         | 100              | 100               |
| Fungal infection                                   | 68                          | 100                         | 100              | 100               |
| HPV positive (focal)                               | 53                          | 77.94                       | 75               | 52.94             |
| Number of partners over the last 12 months         | 62                          | 91.18                       | 75               | 29.41             |
| Urinary tract infection                            | 41                          | 60.29                       | 51.47            | 0                 |
| Menses                                             | 13                          | 19.12                       | 0                | 0                 |
| Lubricant                                          | 16                          | 23.53                       | 0                | 0                 |
| Age                                                | 15                          | 22.06                       | 0                | 0                 |
| HPV positive (multiple)                            | 13                          | 19.12                       | 0                | 0                 |
| Intercourse with an occasional partner (last week) | 10                          | 14.71                       | 0                | 0                 |
| Intercourse with a regular partner (last week)     | 10                          | 14.71                       | 0                | 0                 |
| HPV vaccinated                                     | 12                          | 17.65                       | 0                | 0                 |
| Stress level (1)                                   | 0                           | 0                           | 0                | 0                 |
| Stress level (2)                                   | 0                           | 0                           | 0                | 0                 |
| Stress level (3 (Max))                             | 0                           | 0                           | 0                | 0                 |

Table S3: Proportion of covariables presence among the 68 best models (Model 1) selected by AICc ( $AICc + 5$ )

| Model [2]                                          | Presence in best models (#) | Presence in best models (%) | p.value < 0.1(%) | p.value < 0.05(%) |
|----------------------------------------------------|-----------------------------|-----------------------------|------------------|-------------------|
| Menstrual cup                                      | 111                         | 100                         | 100              | 100               |
| Smoking                                            | 111                         | 100                         | 100              | 93.69             |
| HPV vaccinated                                     | 91                          | 81.98                       | 81.98            | 51.35             |
| Number of partners over the last 12 months         | 85                          | 76.58                       | 40.54            | 2.7               |
| Antibiotics (last week)                            | 105                         | 94.59                       | 0                | 0                 |
| Intercourse with a regular partner (last week)     | 33                          | 29.73                       | 0                | 0                 |
| Age                                                | 40                          | 36.04                       | 10.81            | 0                 |
| Intercourse with an occasional partner (last week) | 28                          | 25.23                       | 0                | 0                 |
| Lubricant                                          | 37                          | 33.33                       | 0                | 0                 |
| HPV positive (multiple)                            | 26                          | 23.42                       | 0                | 0                 |
| HPV positive (focal)                               | 27                          | 24.32                       | 0                | 0                 |
| Menses                                             | 18                          | 16.22                       | 0                | 0                 |
| Stress level (1)                                   | 9                           | 8.11                        | 0                | 0                 |
| Stress level (2)                                   | 9                           | 8.11                        | 0                | 0                 |
| Stress level (3 (Max))                             | 9                           | 8.11                        | 0                | 0                 |

Table S4: Proportion of covariables presence among the 111 best models (Model 1) selected by AICc ( $AICc + 5$ )

Table S5: Best model selected for covariates associated with menstrual cups usage in comparison with tampons - **First visit**

| Response variable: MC (tampon as reference) | OR    | OR SE | CI 2.5% | CI 95% | p.value |    |
|---------------------------------------------|-------|-------|---------|--------|---------|----|
| Smoking                                     | 0.063 | 2.374 | 0.856   | 13.369 | 0.004   | ** |
| Stress level (minimum)                      | 0.376 | 0.097 | 0.061   | 0.487  | 0.396   |    |
| Stress level (intermediate)                 | 4.861 | 0.179 | 0.126   | 0.923  | 0.163   |    |
| Stress level (maximum)                      | 0.000 | 0.020 | 1.001   | 1.080  | 0.994   |    |
| Fungal infection                            | 8.474 | 4.220 | 1.856   | 24.103 | 0.077   | •  |

\*\*\* $p < 0.001$ ; \*\* $p < 0.01$ ; \* $p < 0.05$ ; •  $p < 0.1$

Table S6: Best model selected for covariates associated with menstrual cups usage in comparison with tampons - **Second visit**

| Response variable: MC (tampon as reference) | OR    | OR SE | CI 2.5% | CI 95% | p.value |   |
|---------------------------------------------|-------|-------|---------|--------|---------|---|
| Intercept                                   | 0.001 | 0.136 | 0.144   | 0.722  | 0.073   | . |
| Smoking                                     | 0.127 | 2.374 | 0.856   | 13.369 | 0.028   | * |
| HPV infection                               | 0.293 | 0.097 | 0.061   | 0.487  | 0.079   | . |
| Age                                         | 1.273 | 0.179 | 0.126   | 0.923  | 0.130   |   |
| Number of partners over the last 12 months  | 1.044 | 0.020 | 1.001   | 1.080  | 0.123   |   |
| Fungal infection                            | 9.674 | 4.220 | 1.856   | 24.103 | 0.013   | * |

\*\*\* $p < 0.001$ ; \*\* $p < 0.01$ ; \* $p < 0.05$ ; •  $p < 0.1$





## 92 Bibliography

- 93 1. Murall, C. L. *et al.* Natural history, dynamics, and ecology of human papillomaviruses  
94 in genital infections of young women: Protocol of the PAPCLEAR cohort study. *BMJ*  
95 *Open* **9**, 25129 (2019).
- 96 2. Waterboer, T. *et al.* Multiplex human papillomavirus serology based on in situ-  
97 purified glutathione s-transferase fusion proteins. *Clin Chem* **51**, 1845–1853 (2005).
- 98 3. Murall, C. L. *et al.* HPV cervical infections and serological status in vaccinated and  
99 unvaccinated women. *Vaccine* **38**, 8167–8174 (2020).
- 100 4. Selinger, C. *et al.* Cytokine response following perturbation of the cervicovaginal  
101 milieu during HPV genital infection. *Immunol. Res.* **69**, 255–263 (2021).
- 102 5. France, M. T. *et al.* VALENCIA: a nearest centroid classification method for vaginal  
103 microbial communities based on composition. *Microbiome* **8**, 166 (2020).
- 104 6. Burnham, K. & Anderson, D. *Model Selection and Inference: A Practical Information-*  
105 *Theoretic Approach*. **2**, 75 (2002).
- 106 7. Lê, S., Josse, J. & Husson, F. FactoMineR: An R Package for Multivariate Analysis.  
107 *Journal of Statistical Software* **25**, 1–18 (2008).
